# Supplementary material
Source: PubMed Central journal article supplement (PMC1622769)
Supplement: pnas_0606536103_1.pdf [file pnas_0606536103_1.pdf]

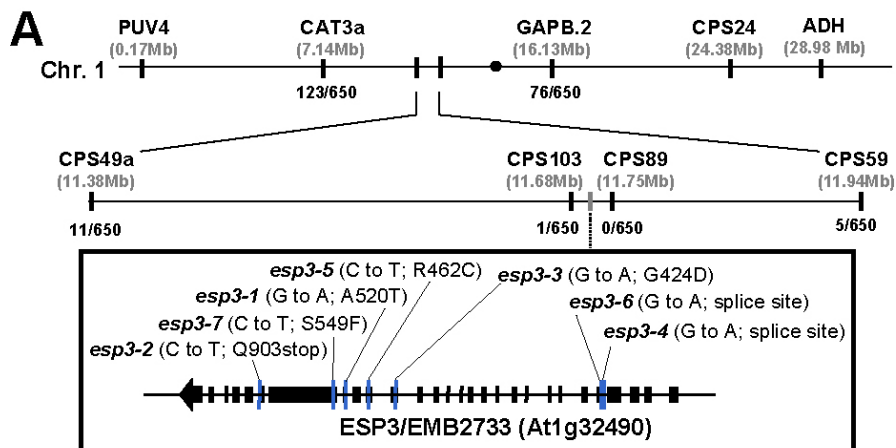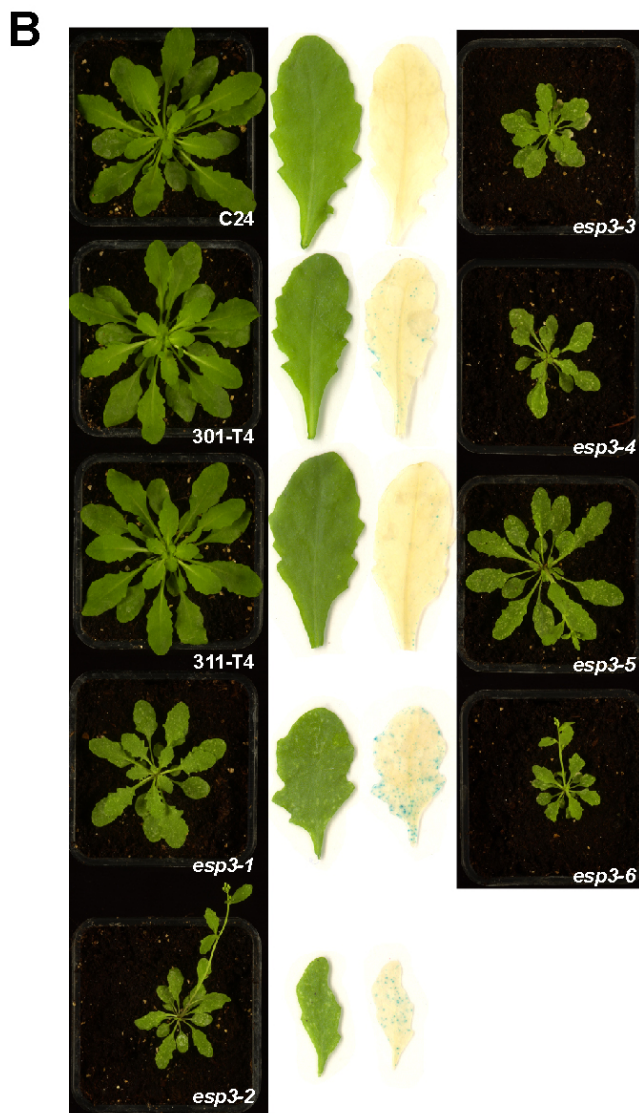

C

|  |                         |        |                                  |                          |                                |
|--|-------------------------|--------|----------------------------------|--------------------------|--------------------------------|
|  | 501                     |        |                                  |                          | 600                            |
|  | <b>At1g32490</b>        | (411)  | <b>KE</b> SRQVQLVLEPGSGKTKTQ     | <b>POV</b> YGLAAYTKR     | <b>IK</b> YCTQPRRVAAMSVAAARVAQ |
|  | <b>At2g35340</b>        | (460)  | <b>KE</b> SRQVQLVLEPGSGKTKTQ     | <b>POV</b> YGLAAYTKR     | <b>IK</b> YCTQPRRVAAMSVAAARVAQ |
|  | <b>At4g16680</b>        | (235)  | <b>KE</b> SRQVQLVLEPGSGKTKTQ     | <b>POV</b> YGLAAYTKR     | <b>IK</b> YCTQPRRVAAMSVAAARVAQ |
|  | <b>C.elegansM064</b>    | (377)  | <b>KE</b> SRQVQLVLEPGSGKTKTQ     | <b>POV</b> YGLAAYTKR     | <b>IK</b> YCTQPRRVAAMSVAAARVAQ |
|  | <b>H.sapiensCDC28-1</b> | (412)  | <b>AK</b> NRQVQLVLEPGSGKTKTQ     | <b>POV</b> YGLAAYTKR     | <b>IK</b> YCTQPRRVAAMSVAAARVAQ |
|  | <b>S.cerevisiaePRP2</b> | (236)  | <b>KE</b> SRQVQLVLEPGSGKTKTQ     | <b>POV</b> YGLAAYTKR     | <b>IK</b> YCTQPRRVAAMSVAAARVAQ |
|  | <b>S.pombeCDC28</b>     | (384)  | <b>NE</b> SRQVQLVLEPGSGKTKTQ     | <b>POV</b> YGLAAYTKR     | <b>IK</b> YCTQPRRVAAMSVAAARVAQ |
|  |                         |        | <b>I</b>                         | <b>la</b>                |                                |
|  |                         |        | <b>G424D</b>                     |                          | <b>R462C</b>                   |
|  | <b>At1g32490</b>        | (508)  | <b>DL</b> ASYSVIVLEDEAHERTLSDTLL | <b>PQV</b> YKDLARFRD     | <b>IKL</b> LISATMDAERKPSDF     |
|  | <b>At2g35340</b>        | (557)  | <b>DL</b> ASYSVIVLEDEAHERTLSDTLL | <b>PQV</b> YKDLARFRD     | <b>IKL</b> LISATMDAERKPSDF     |
|  | <b>At4g16680</b>        | (332)  | <b>KL</b> ASYSVIVLEDEAHERTLSDTLL | <b>PQV</b> YKDLARFRD     | <b>IKL</b> LISATMDAERKPSDF     |
|  | <b>C.elegansM064</b>    | (475)  | <b>DL</b> ASYSVIVLEDEAHERTLSDTLL | <b>PQV</b> YKDLARFRD     | <b>IKL</b> LISATMDAERKPSDF     |
|  | <b>H.sapiensCDC28-1</b> | (510)  | <b>DL</b> ASYSVIVLEDEAHERTLSDTLL | <b>PQV</b> YKDLARFRD     | <b>IKL</b> LISATMDAERKPSDF     |
|  | <b>S.cerevisiaePRP2</b> | (336)  | <b>KL</b> ASYSVIVLEDEAHERTLSDTLL | <b>PQV</b> YKDLARFRD     | <b>IKL</b> LISATMDAERKPSDF     |
|  | <b>S.pombeCDC28</b>     | (482)  | <b>DL</b> ASYSVIVLEDEAHERTLSDTLL | <b>PQV</b> YKDLARFRD     | <b>IKL</b> LISATMDAERKPSDF     |
|  |                         |        | <b>II</b>                        | <b>III</b>               |                                |
|  |                         |        | <b>A520T</b>                     |                          | <b>S549F</b>                   |
|  | <b>At1g32490</b>        | (607)  | <b>GD</b> LVFVPSQREIETAPR        | <b>IKH</b> YGLCGLRILILIQ | <b>YAN</b> LISLQAKI            |
|  | <b>At2g35340</b>        | (656)  | <b>GD</b> LVFVPSQREIETAPR        | <b>IKH</b> YGLCGLRILILIQ | <b>YAN</b> LISLQAKI            |
|  | <b>At4g16680</b>        | (431)  | <b>GD</b> LVFVPSQREIETAPR        | <b>IKH</b> YGLCGLRILILIQ | <b>YAN</b> LISLQAKI            |
|  | <b>C.elegansM064</b>    | (505)  | <b>GD</b> LVFVPSQREIETAPR        | <b>IKH</b> YGLCGLRILILIQ | <b>YAN</b> LISLQAKI            |
|  | <b>H.sapiensCDC28-1</b> | (679)  | <b>GD</b> LVFVPSQREIETAPR        | <b>IKH</b> YGLCGLRILILIQ | <b>YAN</b> LISLQAKI            |
|  | <b>S.cerevisiaePRP2</b> | (436)  | <b>GD</b> LVFVPSQREIETAPR        | <b>IKH</b> YGLCGLRILILIQ | <b>YAN</b> LISLQAKI            |
|  | <b>S.pombeCDC28</b>     | (581)  | <b>GD</b> LVFVPSQREIETAPR        | <b>IKH</b> YGLCGLRILILIQ | <b>YAN</b> LISLQAKI            |
|  |                         |        | <b>IV</b>                        | <b>V</b>                 |                                |
|  | <b>At1g32490</b>        | (707)  | <b>L</b> ITVPSKASATQRAGAGRS      | <b>GKCK</b> RLYLAFTANN   | <b>LEEN</b> VDFVARTN           |
|  | <b>At2g35340</b>        | (756)  | <b>L</b> ITVPSKASATQRAGAGRS      | <b>GKCK</b> RLYLAFTANN   | <b>LEEN</b> VDFVARTN           |
|  | <b>At4g16680</b>        | (531)  | <b>L</b> ITVPSKASATQRAGAGRS      | <b>GKCK</b> RLYLAFTANN   | <b>LEEN</b> VDFVARTN           |
|  | <b>C.elegansM064</b>    | (675)  | <b>LH</b> ITVPSKASATQRAGAGRS     | <b>GKCK</b> RLYLAFTANN   | <b>LEEN</b> VDFVARTN           |
|  | <b>H.sapiensCDC28-1</b> | (709)  | <b>L</b> ITVPSKASATQRAGAGRS      | <b>GKCK</b> RLYLAFTANN   | <b>LEEN</b> VDFVARTN           |
|  | <b>S.cerevisiaePRP2</b> | (536)  | <b>L</b> ITVPSKASATQRAGAGRS      | <b>GKCK</b> RLYLAFTANN   | <b>LEEN</b> VDFVARTN           |
|  | <b>S.pombeCDC28</b>     | (681)  | <b>L</b> ITVPSKASATQRAGAGRS      | <b>GKCK</b> RLYLAFTANN   | <b>LEEN</b> VDFVARTN           |
|  |                         |        | <b>VI</b>                        | <b>VII</b>               |                                |
|  | <b>At1g32490</b>        | (807)  | <b>IN</b> RRRSLRSTPLMLRSLVGS     | ----                     | <b>IK</b> CSKRLITAAIMLSS       |
|  | <b>At2g35340</b>        | (856)  | <b>IN</b> RRRSLRSTPLMLRSLVGS     | ----                     | <b>IK</b> CSKRLITAAIMLSS       |
|  | <b>At4g16680</b>        | (627)  | <b>IN</b> RRRSLRSTPLMLRSLVGS     | ----                     | <b>IK</b> CSKRLITAAIMLSS       |
|  | <b>C.elegansM064</b>    | (775)  | <b>IN</b> RRRSLRSTPLMLRSLVGS     | ----                     | <b>IK</b> CSKRLITAAIMLSS       |
|  | <b>H.sapiensCDC28-1</b> | (809)  | <b>TS</b> RRRSLRSTPLMLRSLVGS     | ----                     | <b>IK</b> CSKRLITAAIMLSS       |
|  | <b>S.cerevisiaePRP2</b> | (636)  | <b>IN</b> RRRSLRSTPLMLRSLVGS     | ----                     | <b>IK</b> CSKRLITAAIMLSS       |
|  | <b>S.pombeCDC28</b>     | (781)  | <b>IN</b> RRRSLRSTPLMLRSLVGS     | ----                     | <b>IK</b> CSKRLITAAIMLSS       |
|  |                         |        | <b>VIII</b>                      | <b>IX</b>                |                                |
|  | <b>At1g32490</b>        | (901)  | <b>L</b> IVRSMKRARDRDQQLG        | <b>LLR</b> LELVDSISN     | ----                           |
|  | <b>At2g35340</b>        | (950)  | <b>L</b> IVRSMKRARDRDQQLG        | <b>LLR</b> LELVDSISN     | ----                           |
|  | <b>At4g16680</b>        | (723)  | <b>L</b> IVRSMKRARDRDQQLG        | <b>LLR</b> LELVDSISN     | ----                           |
|  | <b>C.elegansM064</b>    | (868)  | <b>L</b> IVRSMKRARDRDQQLG        | <b>LLR</b> LELVDSISN     | ----                           |
|  | <b>H.sapiensCDC28-1</b> | (902)  | <b>L</b> IVRSMKRARDRDQQLG        | <b>LLR</b> LELVDSISN     | ----                           |
|  | <b>S.cerevisiaePRP2</b> | (728)  | <b>L</b> IVRSMKRARDRDQQLG        | <b>LLR</b> LELVDSISN     | ----                           |
|  | <b>S.pombeCDC28</b>     | (874)  | <b>L</b> IVRSMKRARDRDQQLG        | <b>LLR</b> LELVDSISN     | ----                           |
|  |                         |        | <b>Q903stop</b>                  |                          |                                |
|  | <b>At1g32490</b>        | (981)  | <b>E</b> RMVYVLCGLVLSKSG         | <b>Q</b> MLLTKPK         | <b>EP</b> HLLEIAPHY            |
|  | <b>At2g35340</b>        | (1030) | <b>E</b> RMVYVLCGLVLSKSG         | <b>Q</b> MLLTKPK         | <b>EP</b> HLLEIAPHY            |
|  | <b>At4g16680</b>        | (803)  | <b>S</b> ELMVFVLCGLVLSKSG        | <b>Q</b> MLLTKPK         | <b>EP</b> HLLEIAPHY            |
|  | <b>C.elegansM064</b>    | (947)  | <b>E</b> RMVYVLCGLVLSKSG         | <b>Q</b> MLLTKPK         | <b>EP</b> HLLEIAPHY            |
|  | <b>H.sapiensCDC28-1</b> | (981)  | <b>E</b> RMVYVLCGLVLSKSG         | <b>Q</b> MLLTKPK         | <b>EP</b> HLLEIAPHY            |
|  | <b>S.cerevisiaePRP2</b> | (826)  | <b>E</b> RMVYVLCGLVLSKSG         | <b>Q</b> MLLTKPK         | <b>EP</b> HLLEIAPHY            |
|  | <b>S.pombeCDC28</b>     | (956)  | <b>E</b> RMVYVLCGLVLSKSG         | <b>Q</b> MLLTKPK         | <b>EP</b> HLLEIAPHY            |
|  |                         |        | <b>1182</b>                      |                          |                                |
