# Supplementary material
Source: PubMed Central journal article supplement (PMC1622769)
Supplement: pnas_0606536103_4.pdf [file pnas_0606536103_4.pdf]

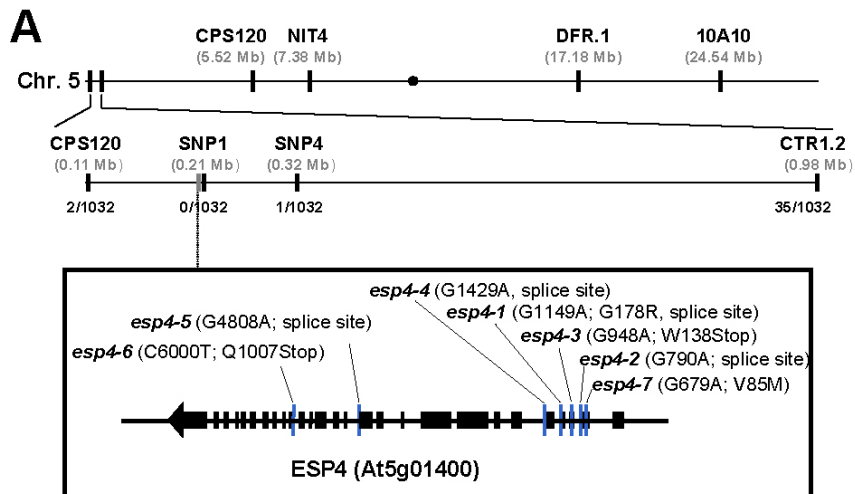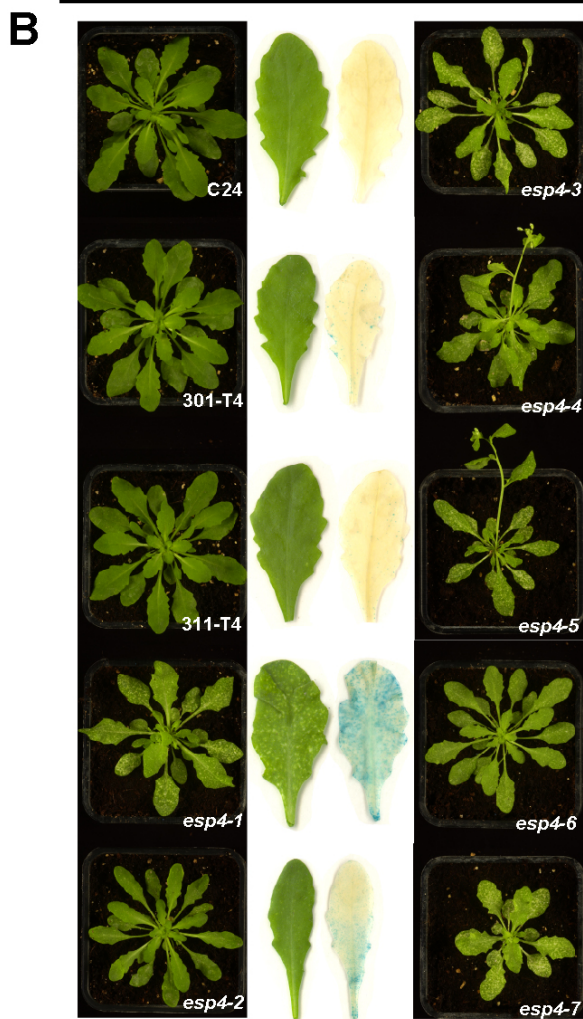

**C**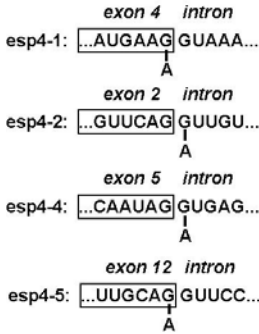**D**

**ESP4 (At5g01400)**

(1) 1-----MASYSRARLKLDSLANSKASATELPPKLRQLRVMRRDQKDDSVFPTELLPHDPIILSDSQDFAGRKFPATLGEGLKYVLELPELPL  
 Os7g49320 (1) -----MAVAAAQDLPTTFHNPNSPLPSSMEPRQLRRLRVLLDFVARALHLADQASPRKLAENGEGRKHMAYLPNVPC  
 Os1g49940 (1) -----MEFEDAGARWPERGDAAGAPFERGADSPRFDSRRLAERLREKSNVLELDLVLPN  
 At1g27595 (1) -----MAAPAAATARAQALSLLAAANHHGDLAVKLSLRQVKEILSLEPSLSEAFIPPYALHLHLSREILRKSLEEEGLRMLDHSYVLGSV  
 At1g27590 (1) -----MEVSTDEHLRRLNQRADLVKTDQSLFPEIVRNLSVANYSDIRYKKNANFWPFGSKNVKFEKLDL  
 Ptal\_Sp (1) -----MSSAEMLQLQAKTAMHNPTTEMLPKVLETASMYHNGNLSLKLPLAKPFTQVLDVVSMDSPANTERPFQAQYLPPLLMAQSTAD  
 Ptal\_Sc (1) -----MDSIIGRSQVFSETANLFTDEKTATARAKVDMCNELVIASPTKCELAKVQETVLGSCAELAEFLSVLSLHSDNMRKQVIVFVEQVCKVKVEL  
 SPK\_Hs (1) -----MDYIQGLNEENETASERIGEALKEARDAETIEKKLLSLSTAMHLLIDPSSLTSLINDFLTEILFAELNDSRLCLVFLKASKDFLTCKNTIER  
 SPK\_Dm (1) -----  
 SPK\_Ce (1) -----

**esp4-7, V85M**

**ESP4 (At5g01400)**

(88) LKSKLEDETPAVRQVACGADFRFTLERMAGLHSS-ENINLLSSYTIKIKFDECSAFQKQ---NSVSLCAMKQVLAITLILYPH  
 Os7g49320 (80) LHLNDDTPAVRQVKTGTTFAKV---RQVIVQLFPSSGGDLSLKLSEALKLSASAFQPMSS---NRARLAKKFKVKTLYLID  
 Os1g49940 (60) LSPFKHDDPQVYNGSASGTNFAAV---EETLITNCKGRDADAWLEMAWTKQFADAHNITHEV---PVTKLFAKGFETWLCFAQ  
 At1g27595 (1) -----  
 At1g27590 (92) VNLSDDEDFPKKSVGVTFFPK---EELNPFHHRG-KDWRGCELTYWVKVDTFATALEPG---CVVSLKAMKQVLAITLILYPH  
 Ptal\_Sp (71) ATRCQDRTIVSYLVNDEYVKKDQISGCTVYVFLHCST---PNDSTLDTFKLNEINDPKGN---KDFLSCRMKSCITLQVYQ  
 Ptal\_Sc (2) VYKYNIVLILCSYFVLDLVAKTNH---QRFEDLCKMLKFLSHWRATPRATDADDETVQWQLAQIDQNIQATKQVSLWQK  
 SPK\_Hs (1) -----M-Q-VYKALVMVSRVSLVQACDMDAGDITLSDSN---DDEITLTKKQVLAITLILYPH  
 SPK\_Dm (101) PPHVNVVSMRDNIAQVIRIQAGCGSVKNGVYVCLSLMEPQSAQANILSLAQLDNDNEN---DEEITLTKKQVLAITLILYPH  
 SPK\_Ce (99) YSYPILPNKSKRYEIKRIVYASN---VYVYVFEALMDKN---INA-SKADAFNLNANRCKMVSVDH---DDEITVTKKQVLAITLILYPH

**esp4-3, W138stop**

Used for Amino-terminal phylogenetic tree

**ESP4 (At5g01400)**

(177) **E**LEAD-----NQLIRGGVYKIGDLSISAKQGLLDQRHPAAKNSSTIILN  
 Os7g49320 (171) LDTPPDDPIEVTEDMCNVAVRGGVPLVNGDIAEASONGLLEQKPKPKVLSSTMIIVPTLSLSAIAQ  
 Os1g49940 (149) SKSDRMPQTEGRNLDLRSQFESLPAVLEAENRALIIVDLOSACAHQGSPLVGTINLSLAIA  
 At1g27595 (1) -----MCWSDSLGHACRSIPEFPAILNISCLSTGFLSD  
 At1g27590 (181) ASDPEKASSEG-SRHMNIGWLAGGVLNLPATMSSANRTFGVDFPQSANRPLGALISGVSYSIPLCLCRYFSLYSS  
 Ptal\_Sp (158) IRDRLVLTKS---DVSLEKVTHTPEVNSNIIRLANDLLEKFSIIFSDSLNLYVSGVNIIPV  
 Ptal\_Sc (183) SPSGNE---INSTLDNHPVAKPALESKAKRLDMLKLYIEQYVMSVFIGANLSLSPVFKRR  
 SPK\_Hs (66) MADSEIPRQ---EHDISDRDRDLYVQYVWEKKAALQQLKYPVHPAISNITATASGAN  
 SPK\_Dm (192) DEBSLKRQD---DLSADVDHCTFRREKQESNNIDVLPQFHTTISVSNLACTSSCT  
 SPK\_Ce (191) TGSNISWAREANTFRNISLSDRFRFESYHKTLQAEENFSALRQTTVAEATSONITVSESCEMTR

**esp4-1, G178R**

**ESP4 (At5g01400)**

(234) -----SLSSVAKRPAVCGRILPVLVSLDP-LSFIKGVAAATNLLAKTVFLSCLCKTPHAAAPWKRDLTSLAKIEIGGGQAQAKKDLFYKTNISQDKD  
 Os7g49320 (245) -----RPFYRERILPVLVSLDPASSIKVQVAP-AFLHAKSAPACLKTHSASAPWRALLEANQIINQADSIHSSNR  
 Os1g49940 (250) -----KRPVYRILPVLVSLDGPDSVLEAVKAPASLYSLKTAFLRSPCQAMIESKDTLVQGL-----RVLSPEGRATEQILRQVE  
 At1g27595 (33) SLSLSPFLVAVARRPVHYNTVSLVLELHFPNLETWKGCHAASVQYSIRTAFLGLPRLCTFSPILIE-SEDKLLR-----AFRAMAADVADQLRQVD  
 At1g27590 (265) -----  
 Ptal\_Sp (221) -----  
 Ptal\_Sc (247) -----  
 SPK\_Hs (131) -----  
 SPK\_Dm (254) -----  
 SPK\_Ce (263) -----

**ESP4 (At5g01400)**

(328) 4VDTEKTVSVEENPLCASSDVAESNLKSRKSGSEYINDLNGDASDGKRRAFPVSVEESTDGLNGNDGVLPVVAISTSQPSDSRQVDSGPAQCVG  
 Os7g49320 (320) -----VESLPLETSDNSNKMLDIDIDNAPEDGRNRKLRQSHHDQHEENKNVVEFSADPTSPNSNASTGNSEAYVYVS  
 Os1g49940 (299) KMTRNIERASRASKDEPSTLDMYPQSKRYPAASDADFATADGVAARFPDTSALNPPFGQASDYNSQVDNEANVHSDSDPALLANCOISPEKMTIE  
 At1g27595 (123) KLVNRNERAARENSWGSVISHQNSWLSKRRKMPQGEDDTNGLVAPRKHNTNWHMLTQQVNTQSGVPSINGE-SGNHLSDEILTYVGVVS  
 At1g27590 (265) -----  
 Ptal\_Sp (221) -----  
 Ptal\_Sc (247) -----  
 SPK\_Hs (131) -----  
 SPK\_Dm (254) -----  
 SPK\_Ce (263) -----

**ESP4 (At5g01400)**

(425) 501LFTVYSQGEAICSEELISSSADLITVYMANHNPCSSYLDGDELVMNLCIVGSDAQIKYP-----  
 Os7g49320 (402) FFAALAAQGDRAASLQLSSSAAIDLAVMVNCHVSHVEPQQQSPSAGQPSGAPSSLLSACF-----  
 Os1g49940 (399) NIALAAGDGAASLCLISTEADMAIDLETMKHETSILLTNSNGQKQKLESSESLNTPANLPS-----H  
 At1g27595 (219) NIALAAGDGAASLCLISLHPDLAIDITSMKHSSTPTLSSVATPDQVSSSTNVHSPPTPAQLPFDILPAGSSFEVPSLSSVADPR  
 At1g27590 (265) -----  
 Ptal\_Sp (290) SMLQYHTKRVDESLEKKROYEGNLSASAKRVKSSAVQSLERMQPQLSHDGLQNNPSTFASQTAINP  
 Ptal\_Sc (344) NSKKTLSRQDKLYSWEKRSLSLSTLSTKTPKTPVSPATGSSSTENMLDQLKQKTYLNKASGHQGNTPFN-----S-----PK  
 SPK\_Hs (210) ---SKDTRKRFDDSDSTKMKEPNIGEDDEKDEPQSGANLAKSQAQISQSDTDTAEFLQPLLT  
 SPK\_Dm (336) QEMARQKRIENYQSAAKRALCEQQVQQQREELDTELETRKQKSTVREKFLRFRNPFVTVI  
 SPK\_Ce (345) QKIAPPRPQHPVAPRXPQNGFEDDDDDDEAGSSTTVNLDKARTEALETGKFMICLNLETVMN



|                         |        | 1401                                                                                                  | 1500 |
|-------------------------|--------|-------------------------------------------------------------------------------------------------------|------|
| <b>ESP4 (At5g01400)</b> | (1218) | ASQPEIQSLSRSTLAVLGLVPDSQGTQTSQVQANETQTSQEQQQQQASEPQOTSQSQQVSVPLSHSQVDHQEPSQVVASQSQSSPIGTVQSAMSQSQNS   |      |
| Os7g49320               | (1162) | ANQPNVRSSTLPRSTLVVLGLAEDQQQPAPQAQSSQNQAETSSSAADTTTEVTQESSAVS-----                                     |      |
| Oslg49940               | (1239) | VNQRNMHSILPRQILKVLGFINEPHQAPIPFVPAAMQTADATSSLPGATLM-----                                              |      |
| Atlg27595               | (1047) | ANQPTIRSLPNSALSVLGLDNGQDSRSQMHPSDATSSIHGAALT-----                                                     |      |
| Atlg27590               | (265)  | -----                                                                                                 |      |
| Ptal_Sp                 | (671)  | -----                                                                                                 |      |
| Ptal_Sc                 | (786)  | -----                                                                                                 |      |
| SPK_Hs                  | (947)  | VRSFTPHQQAHIPNSIMTILEASGKQPEAKEAPAGPLEEDDLEPLTLAPAPAPRPPQDLIGLRLAQEKALKRQLEEEQKPKGGVVGAPSSSSPSPSPSA   |      |
| SPK_Dm                  | (1078) | AESMQDEPMNGSGITQQVLDIISGKSVDFVVTDESGGYISAEHIKKEAPDPSEISVISTVPVLTSLVPLPVPPPIGSDLNQPLPPGED-----         |      |
| SPK_Ce                  | (1082) | IIYSTIATQQQKNMDEKIKKEELHDKERENRERDKRLRREEKKEKEREKERTRESGKERLKTSNFVNFVSVLKRKTVLNPKFFFETEKIENKTNFVILFSK |      |
|                         |        |                                                                                                       |      |
|                         |        | 1501                                                                                                  | 1600 |
| <b>ESP4 (At5g01400)</b> | (1318) | PIDTGRSEMSQSQNSPIDTGRSEMSQSQNSPIDTGRSEMSQSQNSPIDTGRSEMSESQSSPIGQSQSSPIGTGQSDMSQTPQVSDSSAPEPTSHTRTSDP  |      |
| Os7g49320               | (1222) | -----                                                                                                 |      |
| Oslg49940               | (1290) | -----                                                                                                 |      |
| Atlg27595               | (1092) | -----                                                                                                 |      |
| Atlg27590               | (265)  | -----                                                                                                 |      |
| Ptal_Sp                 | (671)  | -----                                                                                                 |      |
| Ptal_Sc                 | (786)  | -----                                                                                                 |      |
| SPK_Hs                  | (1047) | RPGPPPSEAMDFREEGPECETPGIFISMDDDSGLTEAALLDSSLEGPLPKETAAGGLTLKEERSPQTLAPVGEDAMKTPSPAEDAREPEAKGNS----    |      |
| SPK_Dm                  | (1166) | -----                                                                                                 |      |
| SPK_Ce                  | (1182) | KI-----                                                                                               |      |
|                         |        |                                                                                                       |      |
|                         |        | 1601                                                                                                  | 1645 |
| <b>ESP4 (At5g01400)</b> | (1418) | QASSQTLRDDDEKIDDTATSENEVTEIEKSKESSEEEEEEEEEEEEE                                                       |      |
| Os7g49320               | (1222) | -----                                                                                                 |      |
| Oslg49940               | (1290) | -----                                                                                                 |      |
| Atlg27595               | (1092) | -----                                                                                                 |      |
| Atlg27590               | (265)  | -----                                                                                                 |      |
| Ptal_Sp                 | (671)  | -----                                                                                                 |      |
| Ptal_Sc                 | (786)  | -----                                                                                                 |      |
| SPK_Hs                  | (1143) | -----                                                                                                 |      |
| SPK_Dm                  | (1166) | -----                                                                                                 |      |
| SPK_Ce                  | (1184) | -----                                                                                                 |      |
