# Supplementary material
Source: PubMed Central journal article supplement (PMC1622769)
Supplement: pnas_0606536103_6.pdf [file pnas_0606536103_6.pdf]

**ESP5/ CPSF100/ At5g23880**

MGTSVQVTPPLCGVYNNPLSYLVSIDGFNFLIDCGWDLFDFTSLELPLSRVASTIDAVLLSHPDTLHIGALPYAMKQLGLSAPVYATEPVRHLGLLTM  
 YDQFLSRKQVSDFDLFTLDDIDSAFQNVIRLTYSQNYHLSGKGEGEVIAPHAVGHMLGGSIWIRITKDGEDVIYAVDYNHRKRHERLNGTGLVQSFVRPAV  
 LITDAYHALYNTQTARQQRKKEFLDTISKHLEVGGNVLLPVDTAGRVLELELLILEQHWSSRSPSPFIYFLTYVSSSTIDVYKSPLEWMSDSISKSPFET  
 SRDNAPFLRRHVTLLINKTDLDNAPPQPKVVLASMASLEAGFARLIFVEWANDERNLVLFTETGQFGTLARMLQSAPPPKFKVKTMSKRVPLAGEELIA  
 YEEEQNRLLKREEARLRSALVKEEETKLSHGSDNSSEPMIDTKTHDVIQSHGHPAYKDIIDLIDGFVPPSSSVAMPFPYDNTSEWDDFGEIINPDDVVI  
 KDEDMDRGAMHNGGDVGRLEDEATASLMLDTRPSKVMSELIVTVCSLVMKDYEGRSRGSKSMIAHVSPKLKLVLVAIAEATEHLKQHLNNICP  
 HVYAPQIEETVDVTSDLCAKYLQSEKLMNSVIFPKLKGDSVAVWVDSVGVKTERDMRSLLPMPGAASPHKPVLVGLDLKIDAFKQFLSSKGVQVEFAGG  
 GALRCGEYVTLRKVQPTGQKGGASGPQQILIEGPLCEDYKIRDYLSQFYLL

**CPSF160/ At5g51660**

MSFAAYKMMHWPTGVENCASGYITHSLSDSTLQIPIVSVHDDIEAEVWPNKRGIGLPFNVVITAANILEVYIVRAQEEGNTQELRNPKLAKRGGVMDG  
 VYGVSLLEVCHYRLHGNVESIAVLPMGGNSKGRDSIILTFRDAKISVLEFDDSIHSLRMTSMHCFEQPDWLHLKRGRESFPRGPLVKVDPQRCGG  
 VLVYGLQMIILKTSQVSGSLVGDDDAFSSGGTVSARVSESSYIINLRDLEMKHVKDFVFLHGYIEPVIIVLQEEHTWAGRVSWKHHTCVLSALSINST  
 LKQHPVWISAINLPHDAYLLAVVSPSIGGVLVLCANTIIHYHSQSASCALALNNYASSADSSQELPASNFSVELDAAHGTWISNDVALLSTKSGELLLL  
 TLIYDGRAVQRLDLSKSKVASLADITSVGNLSFLGSRLLGDSLLVQFSCRSPPAASLPLGRDEDEIEGEGHQAKRLRMTSDTFQDTIGNEELSLFG  
 STPNNSDSAQKSFSAVRDLSLVNVPKVDIYAGLRINADANATGVSKQSNYELVCCSGHGKNGALCVLRQSRIPEMITEVELPGCKGIWTVYHKSRRG  
 HNADSSKMAADEDEYHAYLIIISLEARVWVLEADLLTEVTEVSDVYVQGHRTIAAGNLPGRRVVIQVFEHGARILDSFMMQELSFSGASNESNSGSES  
 STVSSVSIADPYVLLRMTDSDIRLLVGDPTSTCVSISPPSVLEGSKRKSIACTLYHDKGPEPWLKASTDAWLSGGVGEAVDSDVGGPQDQDIYCVV  
 CYESGALEIFDVPSPFCVSVKDFASGRRLHSDMPIHELEYELNKNSEDNTSSKEIKNTRVVELAMQRWGHHTRPFLFAVLADGTILCYHAYLFDGV  
 DSTKAENSLSENPAALNNSGSSKLRNLKFLRILPDTSTREGTSDGVASQIRITMFKNISGHQGFLLSGSRPGWCMFLFRERLRFSHQCDGSIAAFTVL  
 HNVNCHNGFIVYTAQGVKICQPLSPASIIDNYWVQKIPLKPATPHQVYYAEKNLYPLIVSYPVSKPLNQVLSLVDQEAQQQLDNHNMSSDDLQRTY  
 TVEFEIQLIEPERSGGPWETKAKIPMQTSEHALTVRVVLLNASTGENETRLLAGVTAYVQGEDVAARGRVLLFSFGKNGDNSQNVVTEVYSRELKGA  
 ISAVASIQGHLLISSGPKIILHKWNGTELNGVAFDAPPLYVVMNVVKSFILLGDVHKSIYFLSWKEQGSQSLSLAKDFESLDCFATEFLIDGSTLS  
 LAVSDEQKNIQVFFYAPKMIESWGLKLLSRAEFVGHAVSKFLRLQMVSSGADKINRFALLFGLTLDGSPGCIAPLDEVTFRRLQSLQKKLVDVAVPHV  
 AGLNPLAFRRFSSSGKARRSGPDSIVDCELLCHYEMLPLEEQLELAHQIGTRYIISKDLVDLSVGTSTFL

**CPSF73/ At1g61010**

MASSTSLKRREQPISRDGDQLIVTPLGAGSEVGRSCVYMSFRGKNILFDCGIIHPAYSMAALPYFDEIDPSSIDVLLITHFHIDHAASLPYFLEKTT  
 FNGRVPMTHATAKYKLLLTVDYVVKVSVSDVMLFDEQDINKSMDKIEVIDFHQTVENVGKIFWCYTAGHVLGAAMPVMDIAGVRIILYTDGYSREEDR  
 HLRAAELPQFSPDICIESTSGVQLHQRSHIREKFTDVIHSTVACGRVLIIPAFALGRAQELLLILDEYWANHPDLHNIPFIYASPLAKKCMVAYQT  
 YILSMNDRINQFANSNPFVFKHISPLNSIDDFNDVGPVSMVATPGGLQSGLSRQLFDSWCSDKKNACIIPGYMVEGTAKTIINPEKVTLMNGLTA  
 PLNMQVHYISFSAHADYAQTSTFLKELMPPNIILVHGEANEMMLRKLKLETFEPDGNKIMTPKNCESVEMYFNSEKLAKTIGRLAEKTPDVGDTVSG  
 ILVKKGFTYQIMAPDELHVSQSLSTATVYQRITIPFVGAFGVKHRLEKIFESVEFSTDEESGLPALKVHERVTVKQSEKHSIQWSSDIPDMVSD  
 SIVALILNISREVPKIVMEEEDAVKSEENEGKVEKVIYALVLSLFDGVLKGENGLKLVIRVDGNAQLDKESGEVESEHSGLKERVVRVAFERIQSAVK  
 PIPLSAS

**ESP4/Syplekin/At5g01400**

MASYSRARLKDLANSAKSATELPPKQLRMYMRDLQKDDSVFPTELLPHLFDLLSDQFGAVRKFVAEILGEGIKLYVELIPEIVPLLIKSLEDETPA  
 VARQVIACGADLFRSTLERVAVQGLHSSSELNDLLESSWTWLIKFKDEICSVAFKQGNSGVKLCAMKFVEALILLYTPHEGIEADFNISILRGGHPVLK  
 IGDLSEIASQKGLGLLDQLRHPAAKSNLSSTIIVLINSLSVAKKRPAVCGRILPVLVSLDPLSFLKGVYAAATNLALKTVFLSCLKCTHPAAAPDRL  
 TSALKEIEGGQAQAKDLFYKNGSIQDKDSVEDTKVSVENPLCASSDVAESNLSRKRSGSEYINIDLNGDASDGKRARITPSVSEESTDGLNGNDG  
 VSLPRVASTSTGSDSRGVSDSGAQQLVGLFGLTVSQGEKAIGSLEILISSISADLLTDDVMMANMHNIPNCCSSYADGTDELVMNMCIVGSDAQIKY  
 PPSFVAGVLSLSTAFPPIAALINPHNEDEEVYSHVDQMPFAEDARTPPGLLATCDTSPFNEESNTVSPQNVIHIGNRESGIPGLESAQHDGSGA  
 LVTNVLSSTNVEAASKNQNASFSGLKLVLDVIPSMSVDKLEEFSPKAVGTVASASQVFLPKISAPVVLDLDEEKDSLQKLVFLRIVEAYKQISMSGGSQ  
 LRFSLLAHLGVEFPSELDPWKILQEHVLSDYLNHEGHETLVRVLYRYLGEAAEQDFFSSTTAASAYESFLLVAEALRDSFPPSDKSLKLLGDSPH  
 LPKSVMLLESFCCPGSGEVEKDLQHGDRVTVQGLSAVWSLILMRPGRINDCLNIALQSAVHHLBIRMKAIKRVANKLYLSLSPITEQIEEFKADRLFS

VVSDDCDKMDLCLKSPPNKPQHSISGMSMETPSEATSSSTSVTEAQRCLSLYFALCTKVLRIFTILRLMTNLVFNIIYKNASDPVKQAIHLQIPILVTR  
MGSSSELLKIIADPPSGSDNLLIQVLQTLTEGPTPSELILTIRKLFDTRIKDV<sup>8</sup>EILFPILPFLPR<sup>5</sup>DDVLRIFPHMVNLPMEKFQVALSRVLQSSQS  
GPVLSPEALIAIHSIDPAR<sup>1</sup>DGIPLKQVTDACNTCFAQRQFTFTQQVLAGVLNQLVQQIPLPMLFMRTVLQAIGAFPALSDFILEILSRLVSKQIWKYP  
KLWVGFLKCTQTTQPQSYK<sup>1</sup>VLLQLPPLQLGNALTK<sup>1</sup>IPALRAPLTAHASQPEIQSSLPRSTLAVLGLVPDSQGTQTSQVQANETQTSQEQQQQQASEPQ  
QTSQSQQVSVPLSHSQVDHQEPSQVVASQSQSSPIGTVQSAMSQSQNSPIDTGRSEMSQSQNSPIDTGRSEMSQSQNSPIDTGRSEMSQSQNSPIDTGR  
RSEMSESQSSPIGQSQSSPIGTGQSDMSQTPQVSDSSAPEPTSHTRTSDPQASSQTLRDDDEKIDDTATSENEVTEIEKSKESSEEEEEEEEEEE

#### FY/Pfs2/At5g13480

MYAGGDMHRGSQMPQPPMMRQSSASSTNINPDYHHPSGFPDPNVDSFGAKRMRKHTQR<sup>4</sup>RAVDY<sup>6</sup>TSTVVR<sup>1</sup>YIQARTWQRDSRDR<sup>1</sup>TTLQPTPAAAVDMLP  
TVAYS<sup>1</sup>DNPSTSF<sup>1</sup>AAK<sup>1</sup>FVHASLNKNRCSINRVLWTPSGRRLITGSQSGEFTLWNGQSFNFEMILQAHDQPIRSMVWSHNENYMVSGDDGGTLK<sup>1</sup>YWQNNM  
NNVKANKTAHKESIRDL<sup>1</sup>SFCKTDLKFCSCSDDTTVKVWDFTKCVDESSLTGYIGKGVIEIRFGVMPCNAGHGWDVKSVDWHPTKSLLVSGGKDQLVKL  
WDTRSGRELCSLHGHNIVLSVKWNQNGNWLLTASKDQIIKLYDIRTMKELQSF<sup>1</sup>RGHTKDV<sup>1</sup>TS<sup>1</sup>LAWHP<sup>1</sup>CHEEYFVSGSSDGSICHWIVGHENPQIEIP  
NAHDNSVWDLAWHPIGYLLCSGSNDHTTKFWCRNRPADNPRDVL<sup>1</sup>MQNQGLTGQALAGSVIYSYNGWFEMDLGFLRFLRGQPYGTALKTQTQVLGYNEQ  
GFGRQPDNFPQSEASPIPGAFVPLTRNEGTIPGIGIAMPFDASSQGDHKQPLPGSMALGAPPLPPGPHPSLLGSGQQQGYQQQQQHGHPPQMLPMP  
NMPHHQLPPSSHMPLHPPHLLPRPMQMPPHGHMPPPSMPMSHQMPGSMGMQGGMNPQMSQSHFMGAPSGVFGQGPNSGGPQMYPQGRGGFNRPQMI<sup>1</sup>PGY  
NNPFQQQQQPPLPPGPPN<sup>1</sup>QQHQ
