# Supplementary material
Source: PubMed Central journal article supplement (PMC1622769)

**A**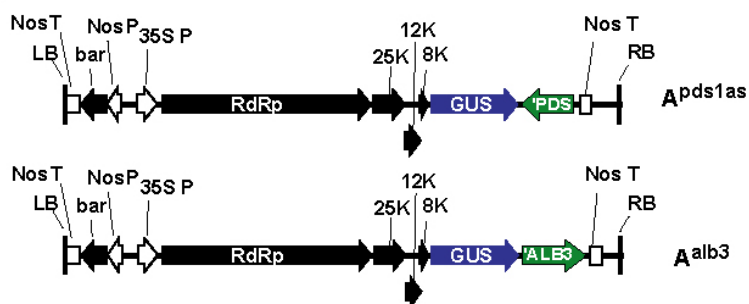**B**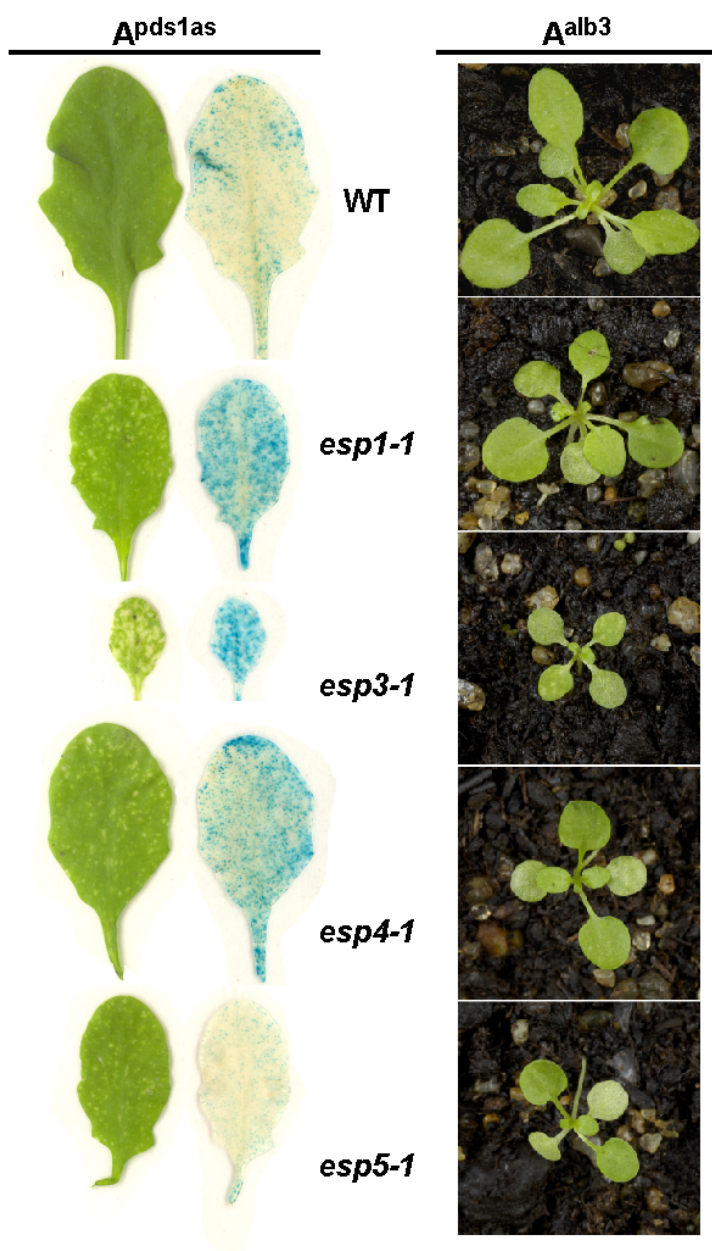

Supplement: pnas_0606536103_2.pdf [file pnas_0606536103_2.pdf]

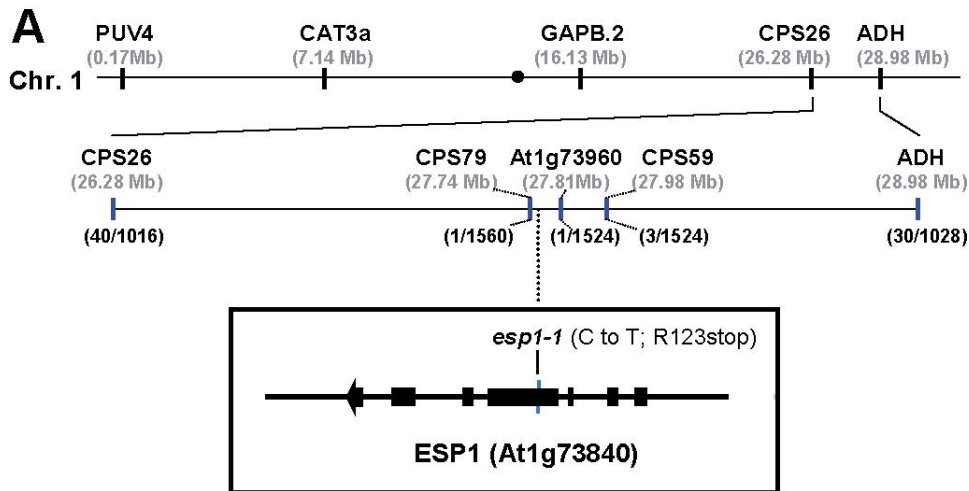

**B**

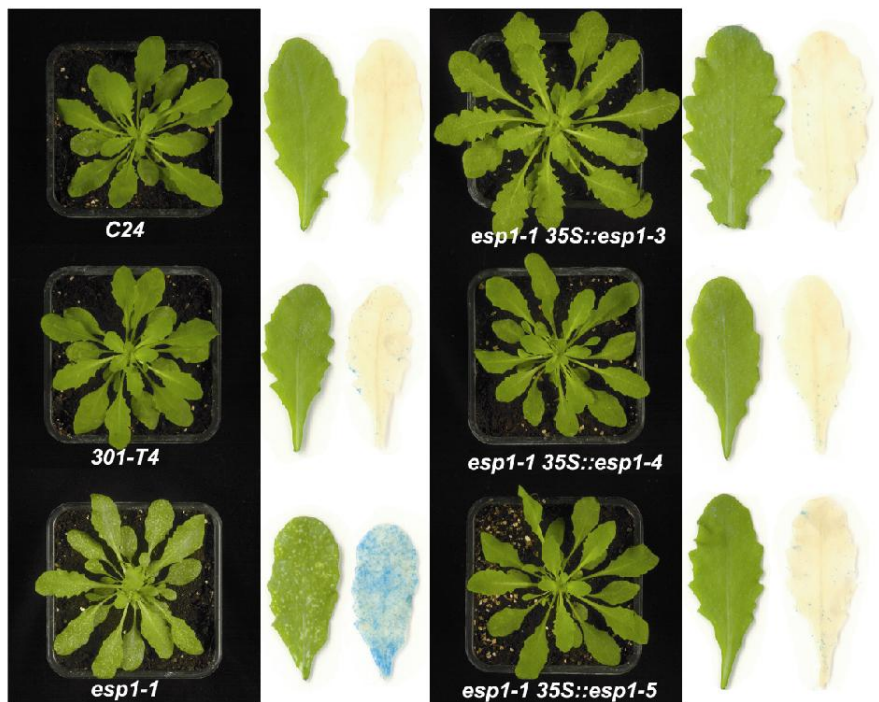

Supplement: pnas_0606536103_3.pdf [file pnas_0606536103_3.pdf]

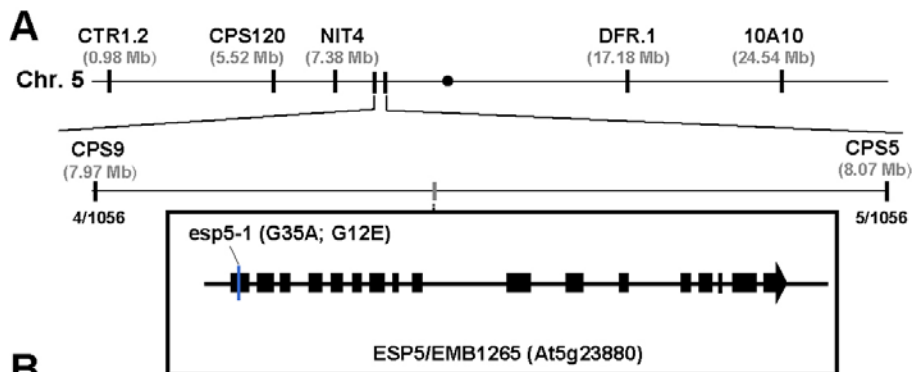

**B**

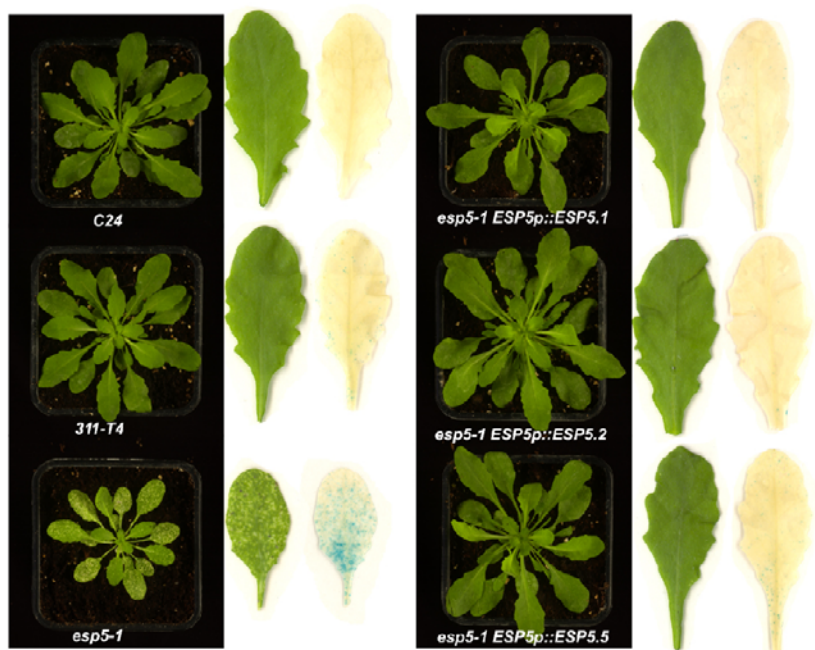

**C**

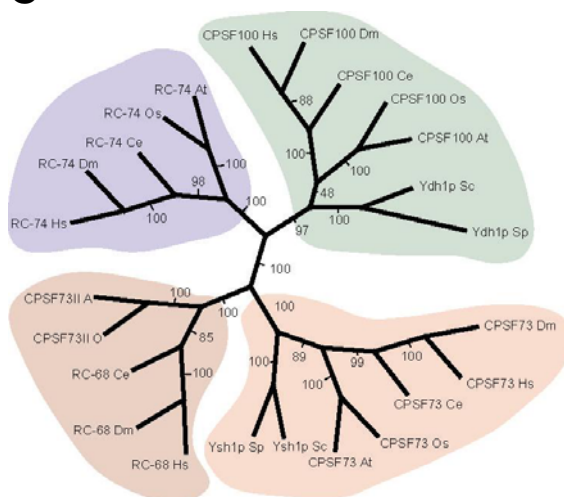

Supplement: pnas_0606536103_5.pdf [file pnas_0606536103_5.pdf]

**C24**

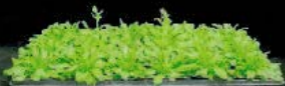

***esp4-1***

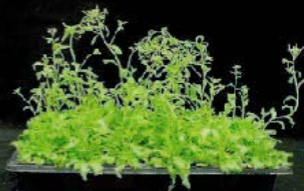

***esp1-1***

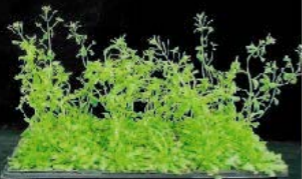

***esp4-3***

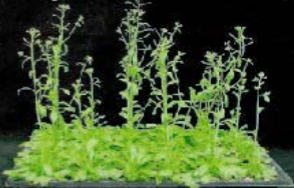

***esp3-1***

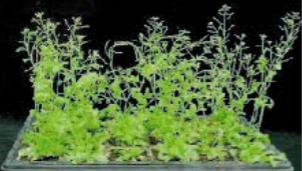

***esp5-1***

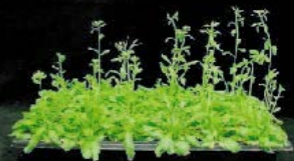

Supplement: pnas_0606536103_7.pdf [file pnas_0606536103_7.pdf]
